# Supplementary material for: Salvianolic acid B inhibits mitochondrial dysfunction by up-regulating mortalin
Source: PubMed Central journal article supplement (PMC5333085; doi:10.1038/srep43097), 2017-03-02
Supplement: srep43097-s1.pdf [file srep43097-s1.pdf]

**Salvianolic acid B inhibits mitochondrial dysfunction  
by up-regulating mortalin**

Yunxia Liu<sup>1,2,#</sup>, Yingying Hu<sup>1,3,#</sup>, Qiukai E<sup>1,4</sup>, Ji Zuo<sup>1</sup>, Ling Yang<sup>1,\*</sup>, Wen Liu<sup>1,\*</sup>

**Supplementary Figure1**

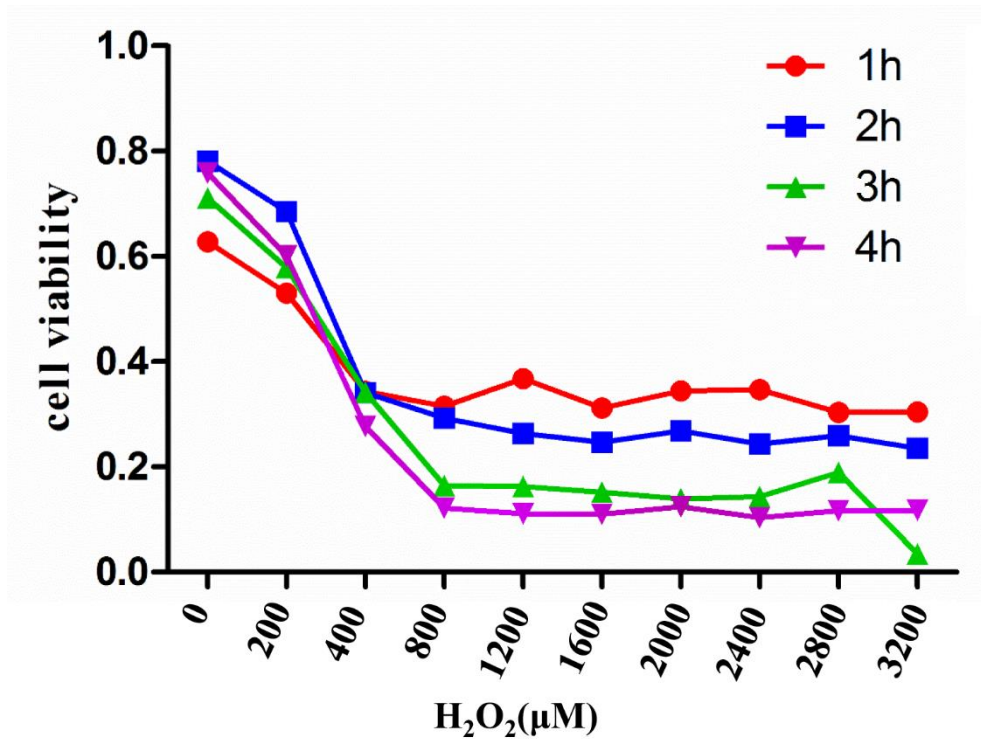

**Supplementary Figure1** To determine the proper working concentrations of H<sub>2</sub>O<sub>2</sub> through measuring the cell viabilities of HL-7702 cells. Cells were treated with H<sub>2</sub>O<sub>2</sub> (200, 400, 800, 1200, 1600, 2000, 2400, 2800 or 3200 μM) respectively for different time points (1h, 2h, 3h or 4h).

**Supplementary  
Figure 2**

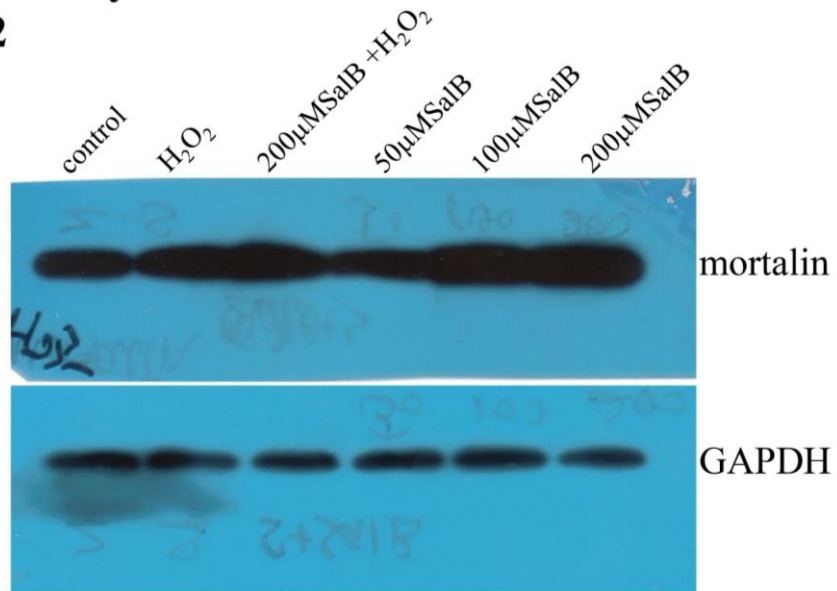

**Supplementary Figure2 Full-length blots of Figure 3A.**

**Supplementary  
Figure 3**

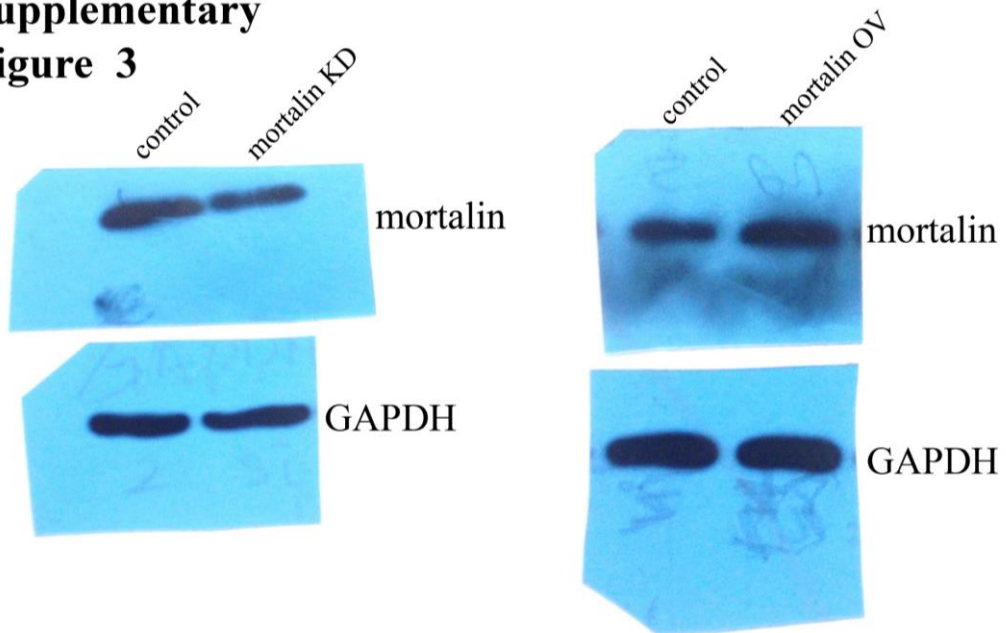

**Supplementary Figure3 Full-length blots of Figure 4A.**

**Supplementary  
Figure 4**

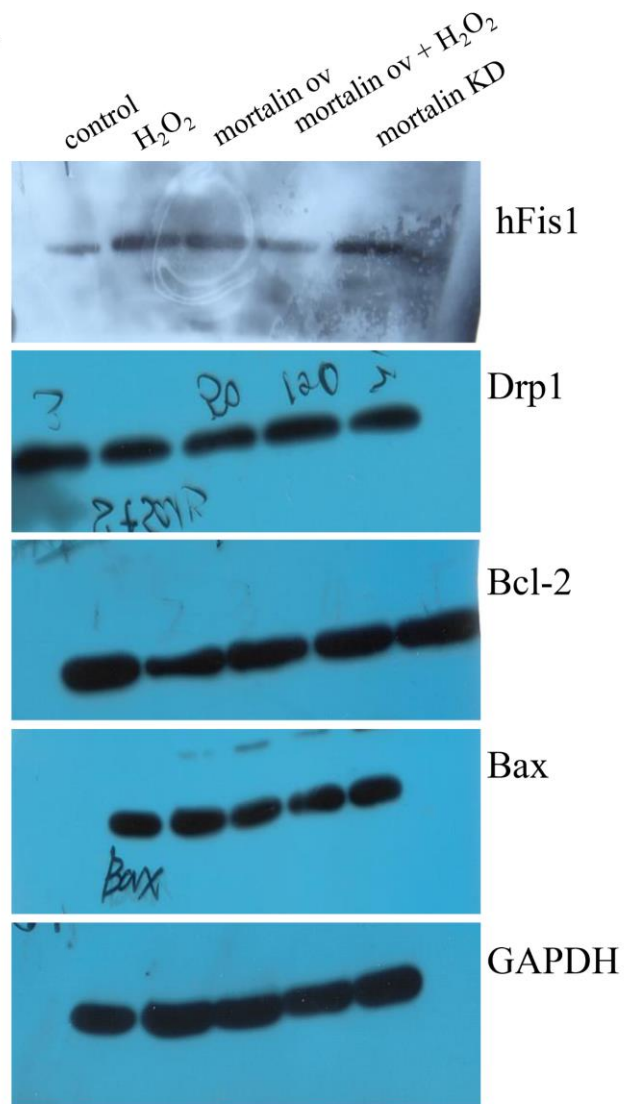

**Supplementary Figure4 Full-length blots of Figure 5L.**

**Supplementary  
Figure 5**

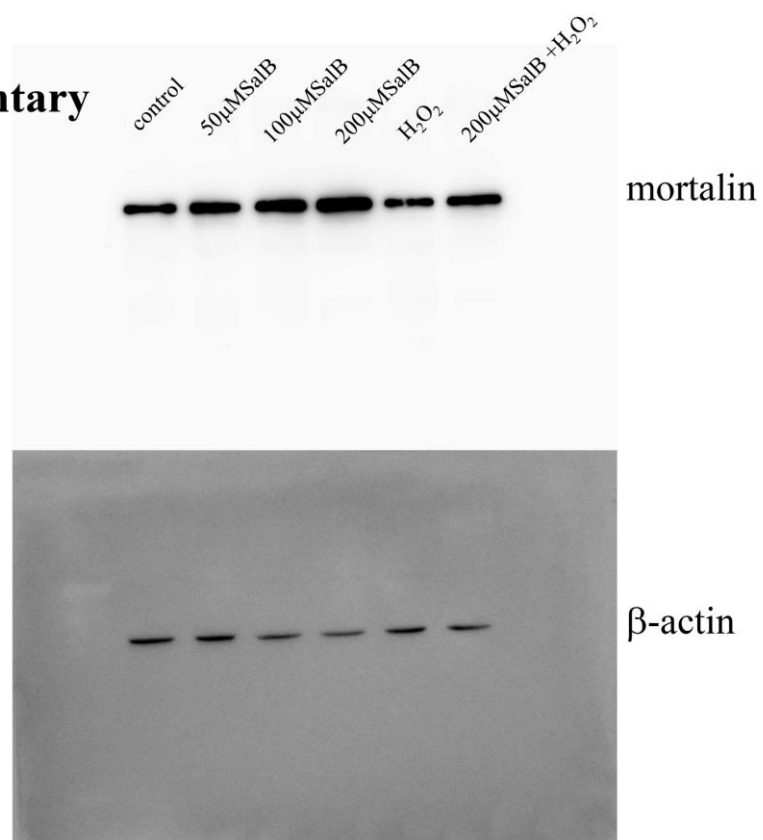

**Supplementary Figure5 Full-length blots of Figure 6A.**
